# Supplementary material
Source: publisher figshare collection journal article supplement (https://sage.figshare.com/articles/dataset/_/7543589)
Supplement: Supplementary file 1 [file 14021684]

## **SUPPLEMENTARY MATERIALS**

**Title:** Impairment in activities of daily living, care receipt and unmet needs in a middle-aged and older rural South African population: findings from the HAALSI study

**Supplementary Material 1: Questions on basic Activities of Daily Living, use of aids and assistance from baseline HAALSI questionnaire**

Please tell me whether you have difficulty performing any of the following tasks on a regular basis. Exclude any difficulties that you expect to last less than three months.

1. Because of a health or memory problem do you have any difficulty with walking across a room?
  - a. Yes
  - b. No
  - c. Can't do
  - d. Don't want to
2. Do you ever use equipment or devices (e.g., cane) when crossing a room?
  - a. Yes
  - b. No
3. What equipment is that? [Check all that apply]
  - a. Railing
  - b. Walker
  - c. Cane
  - d. Crutches
  - e. Orthopedic shoes
  - f. Leg/back brace
  - g. Prosthesis
  - h. Oxygen/respirator
  - i. Furniture/walls
  - j. Wheelchair/cart
  - k. Other: specify
4. Does anyone ever help you get across a room?
  - a. Yes
  - b. No
5. Because of health and memory problems, do you have any difficulty with dressing?  
Dressing includes taking clothes out, putting them on, buttoning up, and fastening a belt.
  - a. Yes
  - b. No
  - c. Can't do
  - d. Don't want to
6. Do you ever use equipment or devices (e.g., cane) when dressing?
  - a. Yes
  - b. No
7. What equipment is that? [Check all that apply]
  - a. Railing
  - b. Walker
  - c. Cane
  - d. Crutches
  - e. Orthopedic shoes
  - f. Leg/back brace
  - g. Prosthesis
  - h. Oxygen/respirator
  - i. Furniture/walls
  - j. Wheelchair/cart
  - k. Other: specify
8. Does anyone ever help you with dressing?
  - a. Yes
  - b. No

9. Because of health and memory problems, do you have any difficulty with bathing or showering?
- a. Yes
  - b. No
  - c. Can't do
  - d. Don't want to
10. Do you ever use equipment or devices (e.g., cane) when bathing or showering?
- a. Yes
  - b. No
11. What equipment is that? [Check all that apply]
- a. Railing
  - b. Walker
  - c. Cane
  - d. Crutches
  - e. Orthopedic shoes
  - f. Leg/back brace
  - g. Prosthesis
  - h. Oxygen/respirator
  - i. Furniture/walls
  - j. Wheelchair/cart
  - k. Other: specify
12. Does anyone ever help you with bathing or showering?
- a. Yes
  - b. No
13. Because of health and memory problems, do you have any difficulty with eating, such as cutting up your food? (By eating, we mean eating food by oneself when it is ready.)
- a. Yes
  - b. No
  - c. Can't do
  - d. Don't want to
14. Does anyone ever help you with eating?
- a. Yes
  - b. No
15. Do you have any difficulty with getting into or out of the place where you sleep?
- a. Yes
  - b. No
  - c. Can't do
  - d. Don't want to
16. Do you ever use equipment or devices (e.g., cane) when getting into or out of the place where you sleep?
- a. Yes
  - b. No
17. What equipment is that? [Check all that apply]
- a. Railing
  - b. Walker
  - c. Cane
  - d. Crutches
  - e. Orthopedic shoes
  - f. Leg/back brace
  - g. Prosthesis
  - h. Oxygen/respirator
  - i. Furniture/walls
  - j. Wheelchair/cart
  - k. Other: specify
18. Does anyone ever help you with getting into or out of the place where you sleep?
- a. Yes
  - b. No

19. Because of health and memory problems, do you have any difficulties with using the toilet, including getting up and down?
- a. Yes
  - b. No
  - c. Can't do
  - d. Don't want to
20. Do you ever use equipment or devices (e.g., cane) when using the toilet?
- a. Yes
  - b. No
21. What equipment is that? [Check all that apply]
- a. Railing
  - b. Walker
  - c. Cane
  - d. Crutches
  - e. Orthopedic shoes
  - f. Leg/back brace
  - g. Prosthesis
  - h. Oxygen/respirator
  - i. Furniture/walls
  - j. Wheelchair/cart
  - k. Other: specify
22. Does anyone ever help you with using the toilet?
- a. Yes
  - b. No
23. Do you use any of the following on a regular basis? (Check all that apply)
- a. Walking stick
  - b. Travel device
  - c. Manual wheelchair
  - d. Electric Wheelchair
  - e. Catheter, urine collection bag
  - f. Toilet Series
  - g. None of the above
24. Who most often helps you with dressing, bathing, eating, getting out of bed, using the toilet, controlling urination and defecation, doing chores, preparing hot meals, shopping, managing money, making phone calls, taking medications? (Choose up to 3 people)
- a. Spouse
  - b. Mother
  - c. Father
  - d. Mother-in-law
  - e. Father-in-law
  - f. Children
  - g. Sibling
  - h. Sibling of spouse
  - i. Brother-in-law, sister-in-law
  - j. Spouse of child
  - k. Grandchild
  - l. Other relative
  - m. Paid helper (such as nanny)
  - n. Volunteer or Employee of facility
  - o. Other
  - p. No one helped

## **Supplementary Material 2: Detailed methods for measurement of independent variables**

### ***Biologically measured chronic health conditions***

HIV status was measured based on dried blood spot analysis using Vironostika Uniform 11 assay (Biomerieux, France) Diabetes mellitus was defined as a fasting glucose level  $>7.0\text{mmol/L}$ , random glucose  $\geq 11.1\text{mmol/L}$ , or self-report of ever being told they had diabetes or use of medication. Glucose was measured from a fingerprick blood sample using a CareSensN point of care glucose monitor (iSens Inc. Seoul, S Korea). Hypertension was defined as a measured systolic blood pressure  $>140\text{mmHg}$ , or diastolic blood pressure  $>90\text{mmHg}$ , based on the mean of the second and third of three readings, or self-reported use of hypertensive medication. Anemia was diagnosed from point of care hemoglobin testing using the Hemocue 201 system (Hemocue AB, Angelholm, Sweden) and defined as a hemoglobin level of  $<13\text{g/dL}$  for men or  $<12\text{g/dL}$  for women, as per South African and WHO suggested thresholds (Shisana et al., 2014).

### ***Physical performance***

We measured physical performance, a likely predictor of both ADLs and need for care, in two ways. First, grip strength was measured twice in each hand in the seated position using a Smedley dynamometer; the maximum reading was used in this analysis. Second, gait speed was assessed over the sum of two 2.5m walks on level ground at usual walking pace.

### ***Cognition assessment***

Trained interviewers assessed cognition in the local language, XiTongsa, using a computer-assisted personal interview. Questions were based on the U.S. Health and Retirement Study (HRS). Three cognitive tests comprised a total cognitive score for a total of 24 possible points: orientation to the present date, month, year, and president of South Africa (up to 4 possible points), immediate recall of 10 words (up to 10 possible points), and delayed recall, after approximately one minute of other questioning, using the same word list (up to 10 additional points). Participants were given one of four randomly generated lists of words, and

all words were chosen to be culturally and geographically relevant to the participants. Participants who could not recall a single word after the word list was read aloud once were allowed to hear the word list up to two additional times. A *total cognitive score* was calculated to represent a summary measure of the three cognitive tests and create a brief screening tool for cognitive impairment following the HRS model. Total cognitive score could range from 0 points (no orientation and no immediate or delayed recall) to 24 points (perfect orientation and immediate and delayed recall). Those who were unable to complete the cognitive test were classified as a separate group.

**Supplementary Table 1: Variation in disability and unmet need by disease status and socioeconomic variables**

|                                         | Any ADL impairment<br>or met need |        | Any unmet need |        |
|-----------------------------------------|-----------------------------------|--------|----------------|--------|
|                                         | %                                 | p      | %              | p      |
| Female                                  | 12.1                              |        | 27.5           |        |
| Male                                    | 12.4                              | 0.77   | 19.8           | 0.03   |
| <b>Age</b>                              |                                   |        |                |        |
| 40-49                                   | 4.7                               |        | 44.2           |        |
| 50-59                                   | 7.3                               |        | 33.3           |        |
| 60-69                                   | 10.3                              |        | 20.1           |        |
| 70-79                                   | 15.9                              |        | 22.3           |        |
| 80+                                     | 35.9                              | <0.001 | 18.3           | 0.001  |
| HIV positive                            | 8.5                               |        | 28.1           |        |
| HIV negative                            | 13.2                              | <0.001 | 23.2           | 0.32   |
| Hypertension                            | 13.8                              |        | 19.9           |        |
| No hypertension                         | 8.9                               | <0.001 | 33.3           | <0.001 |
| HT known to patient                     | 15.6                              |        | 21.4           |        |
| No HT known to patient                  | 9.7                               | <0.001 | 26.9           | 0.11   |
| Diabetes mellitus                       | 19.7                              |        | 20.0           |        |
| No diabetes mellitus                    | 11.0                              | <0.001 | 24.8           | 0.29   |
| Bronchitis                              | 17.9                              |        | 20.0           |        |
| No bronchitis                           | 12.2                              | 0.41   | 24.0           | 0.84   |
| Angina                                  | 13.4                              |        | 14.8           |        |
| No angina                               | 12.1                              | 0.41   | 24.9           | 0.08   |
| Stroke                                  | 49.0                              |        | 31.5           |        |
| No stroke                               | 11.1                              | <0.001 | 23.0           | 0.11   |
| Anemia                                  | 15.5                              |        | 25.6           |        |
| No anemia                               | 12.5                              | 0.014  | 22.0           | 0.29   |
| Top 4 quintiles of cognitive testing*   | 8.3                               |        | 23.3           |        |
| Lowest quintile of cognitive testing*   | 23.2                              |        | 20.9           |        |
| Unable to complete do cognitive test    | 48.4                              | <0.001 | 35.1           | 0.04   |
| <b>Living arrangements</b>              |                                   |        |                |        |
| Living alone                            | 14.5                              |        | 22.1           |        |
| Living with one other person            | 16.2                              |        | 24.1           |        |
| Living in 3-6 person household          | 11.8                              |        | 25.3           |        |
| Living in 7+ person household           | 10.6                              | <0.001 | 22.6           | 0.90   |
| Married or cohabiting                   | 9.2                               |        | 21.7           |        |
| Not married or cohabiting               | 15.4                              | <0.001 | 25.3           | 0.31   |
| <b>Level of education <sup>a</sup></b>  |                                   |        |                |        |
| None                                    | 16.3                              |        | 23.2           |        |
| Up to grade 7                           | 10.1                              |        | 25.3           |        |
| Grade 8 to 11                           | 7.3                               |        | 17.9           |        |
| Matriculation (grade 12) or above       | 5.7                               | <0.001 | 33.3           | 0.45   |
| <b>Multimorbidity</b>                   |                                   |        |                |        |
| 0 or 1 comorbidities                    | 11.0                              |        | 24.6           |        |
| ≥2 comorbidities                        | 13.6                              | 0.005  | 23.2           | 0.66   |
| <b>Physical support quartile</b>        |                                   |        |                |        |
| Lowest                                  | 14.8                              |        | 22.0           |        |
| Second most                             | 9.4                               |        | 22.1           |        |
| Third most                              | 11.0                              |        | 19.2           |        |
| Highest                                 | 13.7                              | <0.001 | 30.4           | 0.11   |
| <b>In-person communication quartile</b> |                                   |        |                |        |
| Lowest                                  | 14.3                              |        | 26.1           |        |
| Second most                             | 11.5                              |        | 22.9           |        |
| Third most                              | 11.5                              |        | 21.9           |        |
| Highest                                 | 11.8                              | 0.11   | 24.5           | 0.84   |

**Monthly household income (US\$)**

|         |      |        |      |      |
|---------|------|--------|------|------|
| None    | 11.3 |        | 32.1 |      |
| <245    | 5.8  |        | 34.0 |      |
| 245-362 | 16.0 |        | 19.0 |      |
| >362    | 12.7 | <0.001 | 23.7 | 0.06 |

---



|                           | ADL impairment    |                   |        | Unmet need        |                   |      |
|---------------------------|-------------------|-------------------|--------|-------------------|-------------------|------|
|                           | Yes               | No                | p      | Yes               | No                | p    |
| Median Grip strength (kg) |                   |                   |        |                   |                   |      |
| Males                     | 23.2(14.2, 30.8)  | 31.8 (24.6, 37.9) | <0.001 | 21.8 (0.00, 28.6) | 23.7 (14.9, 31.1) | 0.25 |
| Females                   | 16.8 (9.9, 21.7)  | 23.1 (18.6, 27.9) | <0.001 | 15.0 (0.00, 21.0) | 17.6 (11.4, 22.1) | 0.02 |
| Median Walk speed (m/s)   |                   |                   |        |                   |                   |      |
| Males                     | 0.42 (0.00, 0.56) | 0.63 (0.56, 0.83) | <0.001 | 0.50 (0.00, 0.63) | 0.42 (0.00, 0.56) | 0.68 |
| Females                   | 0.36 (0.00, 0.50) | 0.63 (0.50, 0.83) | <0.001 | 0.38 (0.00, 0.56) | 0.36 (0.00, 0.50) | 0.68 |

ADLs: Activities of Daily Living. Values for continuous variables are medians and interquartile ranges, statistical tests are Pearsons chi-squared for categorical comparisons, and Mann-Whitney U test for continuous variables.

**Supplementary Table 2: Number of Activity of Daily Living impairments and level of unmet need, stratified into younger-old (40-59 years) and older-old (60+ years)**

|                         | ADL impairment |     |                      |      | Met need <sup>a</sup> |      | Of which (%): Partially met need <sup>b</sup> |      | Unmet need <sup>c</sup> |      |
|-------------------------|----------------|-----|----------------------|------|-----------------------|------|-----------------------------------------------|------|-------------------------|------|
|                         | N              |     | % of all respondents |      | 40-59                 | 60+  | 40-59                                         | 60+  | 40-59                   | 60+  |
|                         | 40-59          | 60+ | 40-59                | 60+  |                       |      |                                               |      |                         |      |
| <b>Any impairment</b>   | 145            | 470 | 6.3                  | 20.9 | 17.9                  | 26.8 | 45.5                                          | 53.2 | 36.6                    | 20.0 |
| Walking                 | 124            | 422 | 5.4                  | 15.5 | 24.4                  | 30.3 | 50.0                                          | 58.3 | 26.6                    | 11.4 |
| Eating                  | 21             | 44  | 0.9                  | 1.6  | 0.0                   | 0.0  | 57.1                                          | 56.8 | 42.9                    | 43.2 |
| Bathing                 | 55             | 169 | 2.4                  | 6.2  | 21.8                  | 24.3 | 56.4                                          | 62.7 | 21.8                    | 13.0 |
| Toileting               | 82             | 263 | 3.5                  | 9.7  | 34.1                  | 43.3 | 54.9                                          | 50.2 | 11.0                    | 6.5  |
| Bed transfer            | 67             | 223 | 2.9                  | 8.2  | 38.9                  | 39.0 | 50.7                                          | 54.7 | 10.4                    | 6.3  |
| Dressing                | 56             | 147 | 2.4                  | 5.4  | 25.0                  | 25.2 | 48.2                                          | 60.5 | 26.8                    | 14.3 |
| <b>Impairment count</b> |                |     |                      |      |                       |      |                                               |      |                         |      |
| 1                       | 47             | 165 | 2.0                  | 6.1  | 25.6                  | 44.2 | 40.4                                          | 37.6 | 34.0                    | 18.2 |
| 2                       | 28             | 79  | 1.2                  | 2.9  | 14.3                  | 39.2 | 57.1                                          | 53.2 | 28.6                    | 7.6  |
| 3                       | 24             | 91  | 1.0                  | 3.3  | 25.0                  | 15.4 | 45.8                                          | 72.5 | 29.2                    | 12.1 |
| 4                       | 12             | 37  | 0.5                  | 1.4  | 16.7                  | 13.6 | 25.0                                          | 45.9 | 58.3                    | 40.5 |
| 5                       | 22             | 62  | 1.0                  | 2.3  | 9.1                   | 3.2  | 54.5                                          | 72.6 | 36.4                    | 24.2 |
| 6                       | 12             | 35  | 0.5                  | 1.3  | 0.0                   | 0.0  | 41.7                                          | 51.4 | 58.3                    | 48.6 |

ADLs: Activities of Daily Living. Sample sizes: n=2311 for those aged 40-59 and n=2723 for those aged 60+. For ‘any impairment’ and ‘impairment count’, <sup>a</sup> refers to all needs met, <sup>b</sup> to those with no unmet but  $\geq 1$  partially met need and <sup>c</sup> to  $\geq 1$  unmet need.

**Supplementary Figure 1. Median walk speed for each category of met or unmet need with walking activity.**

| Difficulty | Help given          | Walking aids              | Category of need              | Median (IQR) walk speed (m/s)        |                                      |
|------------|---------------------|---------------------------|-------------------------------|--------------------------------------|--------------------------------------|
|            |                     |                           |                               | Men                                  | Women                                |
| No problem | Help from others    | -                         | Met need                      | 0.50 (0.31-0.83)                     | 0.33 (0.00-0.59)                     |
|            | No help from others | Aids used<br>No aids used | Met need<br>No needs          | 0.45 (0.36-0.71)<br>0.63 (0.56-0.83) | 0.42 (0.28-0.50)<br>0.63 (0.50-0.83) |
| Difficulty | Help from others    | -                         | Partly met need               | 0.00 (0.00-0.42)                     | 0.16 (0.00-0.50)                     |
|            | No help from others | Aids used<br>No aids used | Partly met need<br>Unmet need | 0.42 (0.00-0.56)<br>0.50 (0.45-0.65) | 0.33 (0.00-0.45)<br>0.50 (0.30-0.56) |
| Cannot do  | -                   | -                         | Unmet need                    | 0 (0-0)                              | 0 (0-0)                              |

IQR: Inter-quartile range. m/s : meters per second.
